# Supplementary material for: Import of extracellular ATP in yeast and man modulates AMPK and TORC1 signalling
Source: PubMed Central journal article supplement (PMC6467490; doi:10.1242/jcs.223925), 2019-04-03
Supplement: joces-132-223925-s1.pdf [file joces-132-223925-s1.pdf]

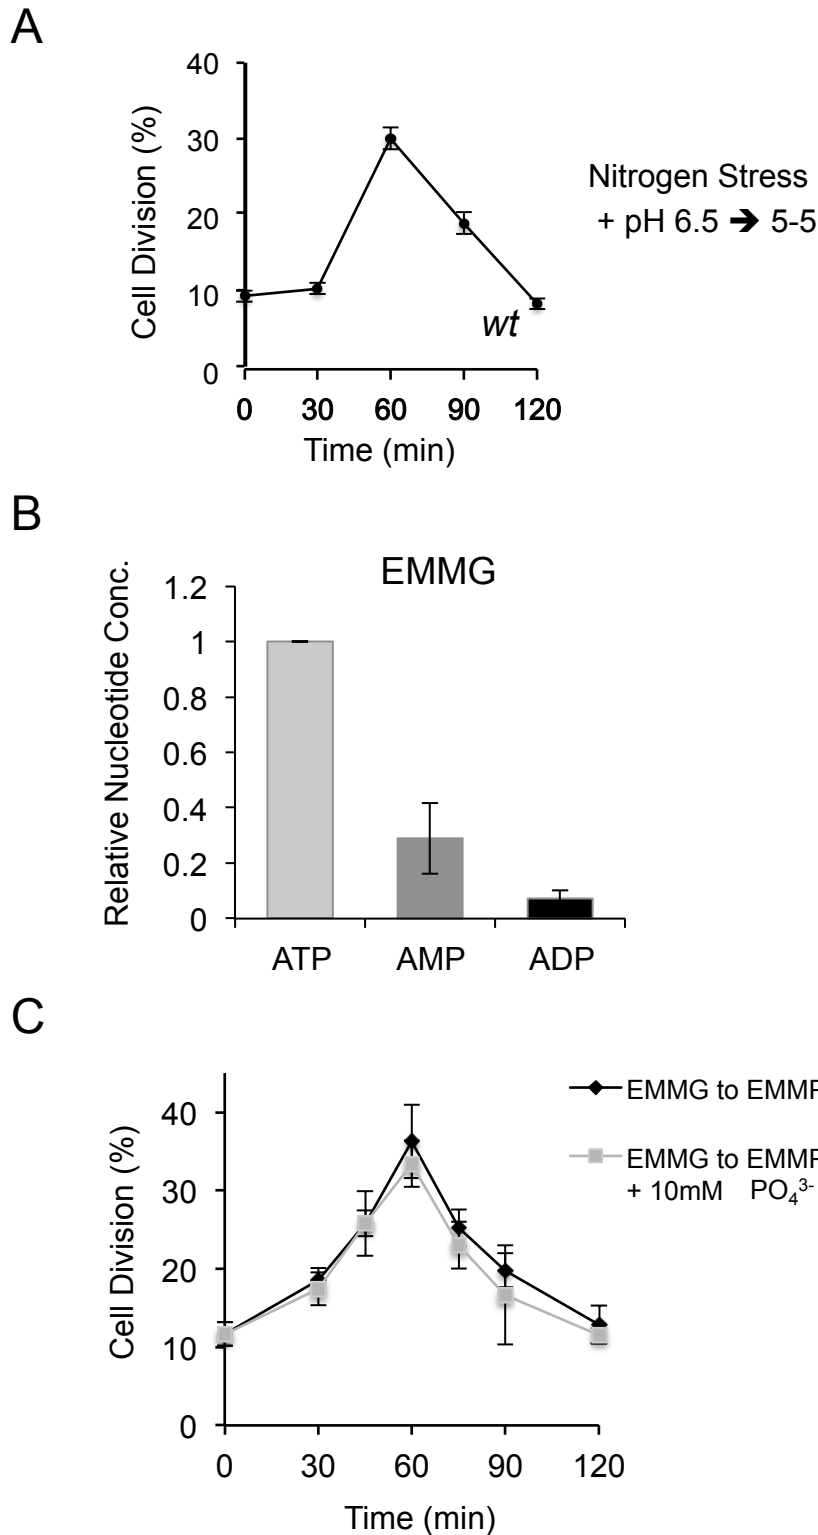

**Figure S1. Import of phosphates or change in pH do not account for the effects of extracellular ATP on the cellular response to nutrient stress.**

**A)** Early exponential prototroph *wt* cells, grown in EMMG, were filtered into EMMP which has had its pH adjusted to pH5.5 through the addition of HCl, to simulate the change in pH when ATP is added to media. Samples were taken to at the indicated time points to calculate the proportion of dividing cells. **B)** Measurements of nucleotide levels in cell grown in EMMG. **C)** Early exponential prototroph *wt* cells, grown in EMMG, were filtered into EMMP or to EMMP to which 10mM phosphate PO<sub>4</sub><sup>3-</sup> at pH 6.5 was added. Samples were taken to at the indicated time points to calculate the proportion of dividing cells.

**A**

SRRM2/SRm300: pS1129 in HEK293T cells

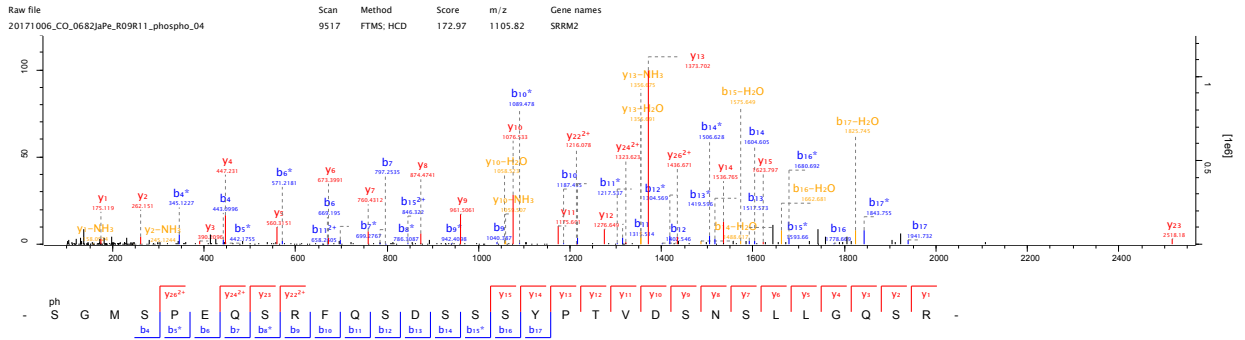

**B**

SRRM2/SRm300 pS1129 in HEK293T + ATPyS cells

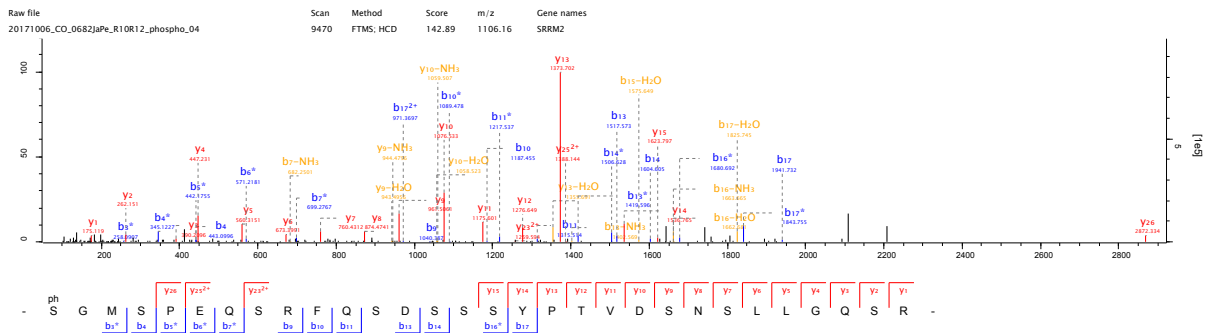

**Figure S2. Detection of phosphorylated SRm300 pS1129 in HEK293T cells.**

**A,B)** Fragmentation pattern of the SRRM2 phosphopeptide S(p)GMSPEQSRFQSDSSSYPTVDSNSLLGQSR indicating S1129 to be phosphorylated in HEK293T cells and HEK293T + ATPyS cells.

| Genotype                              | Cell length at division ( $\mu\text{m}$ ) |
|---------------------------------------|-------------------------------------------|
| <i>wt</i>                             | 13.7 $\pm$ 0.06                           |
| <i>tsc1.<math>\Delta</math></i>       | 10.3 $\pm$ 0.08                           |
| <i>tsc1.<math>\Delta</math> + ATP</i> | 13.3 $\pm$ 0.08                           |
| <i>tsc2.<math>\Delta</math></i>       | 11.0 $\pm$ 0.08                           |
| <i>tsc2.<math>\Delta</math> + ATP</i> | 13.3 $\pm$ 0.1                            |

**Table S1: Cell length at division of indicated strains.**

Cells were grown in EMMG +/- ATP and cell length at division +/- SD were measured, more than 100 cells were measured for each strain.

**Table S2: . Yeast Strains used in this study**

|        |                                |                                          |
|--------|--------------------------------|------------------------------------------|
| JP3    | <i>h-</i>                      | lab stock                                |
| JP350  | <i>h+</i>                      | lab stock                                |
| JP823  | <i>h- tsc1::kanMx6</i>         | E. Henske (van Slegtenhorst et al, 2004) |
| JP824  | <i>h- tsc2::kanMx6</i>         | E. Henske (van Slegtenhorst et al, 2004) |
| JP1079 | <i>h- tsc2::kanMx6</i>         | This study                               |
| JP1081 | <i>h+ tsc1::kanMx6</i>         | This study                               |
| JP1591 | <i>cbs2::kanMx6</i>            | From (Davie et al, 2015)                 |
| JP1624 | <i>ssp2::ura4+ ppk9::ura4+</i> | From (Davie et al, 2015)                 |
| JP1731 | <i>h- Maf1.pk::kanMx6</i>      | From (Du et al, 2012)                    |

Davie E, Forte GM, Petersen J (2015) Nitrogen regulates AMPK to control TORC1 signaling. *Curr Biol* **25**: 445-454

Du W, Hálová L, Kirkham S, Atkin J, Petersen J (2012) TORC2 and the AGC kinase Gad8 regulate phosphorylation of the ribosomal protein S6 in fission yeast. *Biology Open* **1**: 884-888

van Slegtenhorst M, Carr E, Stoyanova R, Kruger WD, Henske EP (2004) Tsc1+ and tsc2+ regulate arginine uptake and metabolism in *Schizosaccharomyces pombe*. *J Biol Chem* **279**: 12706-12713
